# Supplementary material for: A novel hybrid mesostructured silica for the solid-phase extraction of estrogenic hormones from waters
Source: Royal Society of Chemistry journal article supplement (doi:10.1039/c5ay00983a), 2015-01-01
Supplement: c5ay00983a1.pdf [file c5ay00983a1.pdf]

### Steroid sex hormones

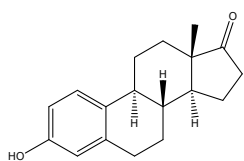

Estrone (E1)

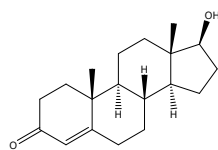

Testosterone (T)

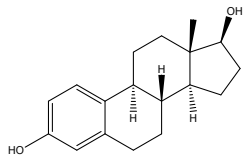

17β-Estradiol (17β-E2)

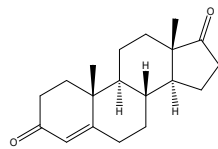

4-Androstene-3,17-dione (AND)

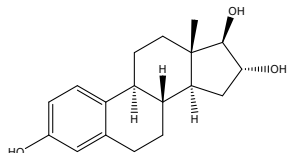

Estriol (E3)

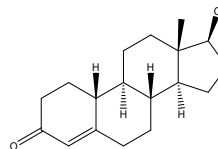

Nandrolone (NAN)

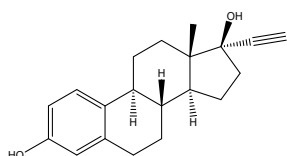

Ethinylestradiol (EE2)

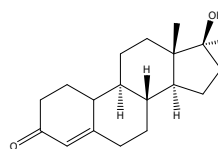

17α-Methyltestosterone (17α-MT)

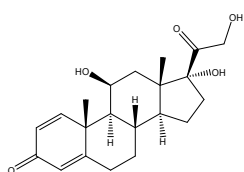

Prednisolone (PRED)

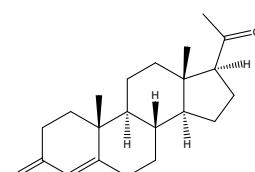

Progesterone (P)

### Non steroid hormones

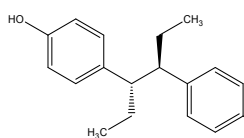

Hexestrol (HEX)

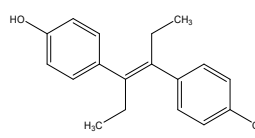

Diethylstilbestrol (DES)

**Fig. A1.** Chemical structure of selected endocrine disruptors.

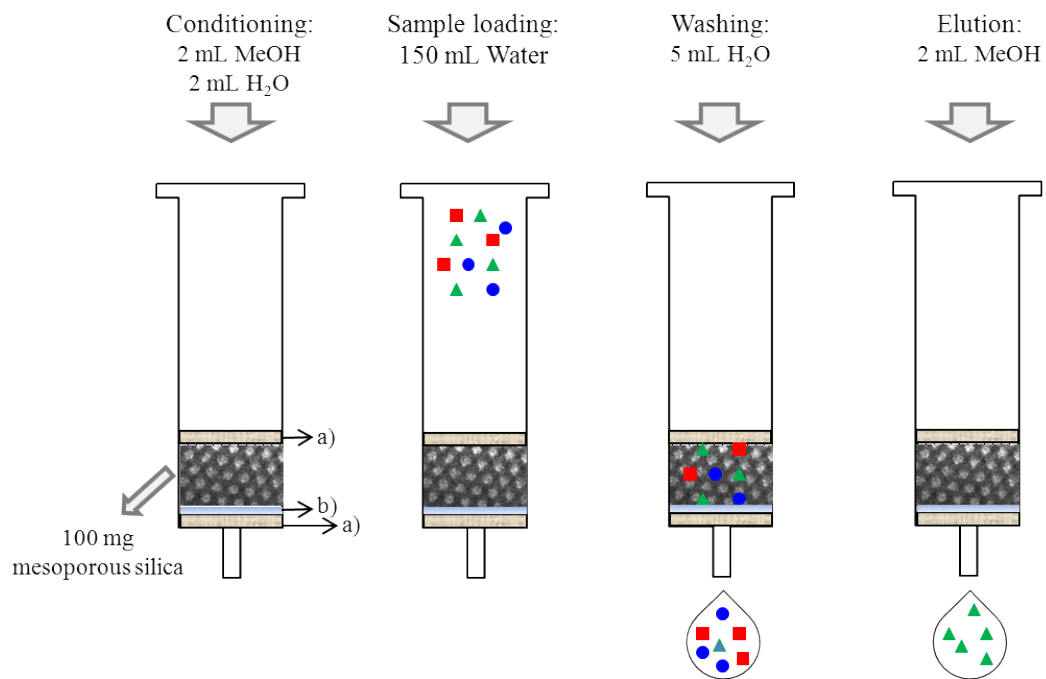

**Fig. A2.** Scheme of SPE procedure: a) PTFE disks, b) nylon filter membrane.

**Table A1.** Characterization data for mesoporous silicas

| Material               | BET surface<br>(m <sup>2</sup> g <sup>-1</sup> ) | Pore volume<br>(cm <sup>3</sup> g <sup>-1</sup> ) | Pore<br>diameter (Å) | L <sub>0</sub> C <sub>18</sub> <sup>a</sup><br>(mmol C <sub>18</sub> g <sup>-1</sup> ) | Particle morphology | Average particle size<br>(length x wide) |
|------------------------|--------------------------------------------------|---------------------------------------------------|----------------------|----------------------------------------------------------------------------------------|---------------------|------------------------------------------|
| SBA-15-C <sub>18</sub> | 796                                              | 0.88                                              | 76                   | 0.69                                                                                   | Cylindrical         | 1.4 μm x 750 nm                          |

<sup>a</sup> Amount of octadecyl groups per gram of silica

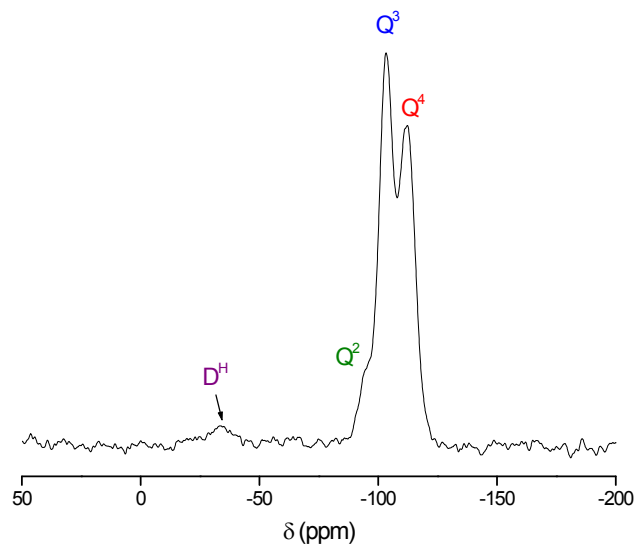

**Fig. A3.**  $^{29}\text{Si}$  NMR spectrum of SBA-15-C<sub>18</sub>.

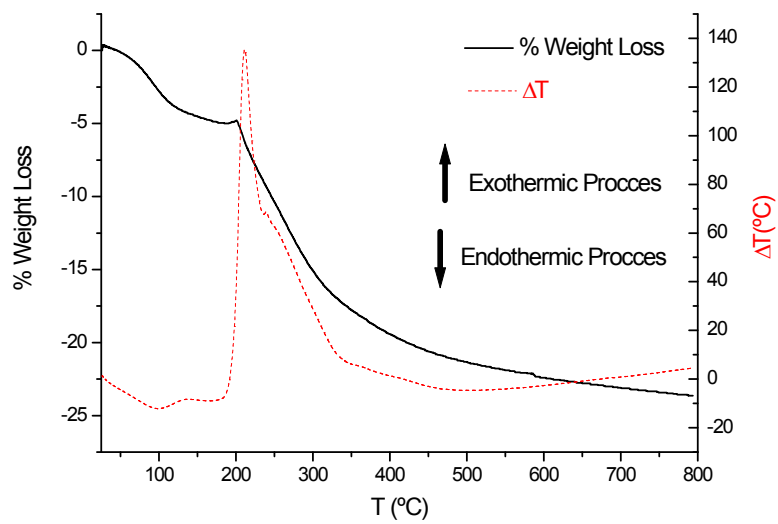

**Fig. A4.** Termogravimetric curve and heat flow of SBA-15-C<sub>18</sub>.

**Table A2.** Comparison of the recovery percentages obtained from the analysis ( $n = 3$ ) of 50 mL of spiked Milli-Q water extracted with SPE cartridges packed with 100 mg of mesoporous silica.

| Analytes <sup>a)</sup>          | A <sup>b)</sup> | B <sup>c)</sup> |
|---------------------------------|-----------------|-----------------|
| Estriol (E3)                    | 104 ± 1         | 100 ± 1         |
| Prednisolone (PRED)             | 102 ± 1         | 99 ± 2          |
| Nandrolone (NAN)                | 105 ± 3         | 100 ± 1         |
| 17β-Estradiol (17β-E2)          | 111 ± 1         | 102 ± 1         |
| Testosterone (T)                | 108 ± 2         | 98 ± 4          |
| Ethinylestradiol (EE2)          | 109 ± 5         | 100 ± 3         |
| Estrone (E1)                    | 104 ± 4         | 100 ± 4         |
| 17α-Methyltestosterone (17α-MT) | 102 ± 4         | 103 ± 5         |
| 4-androstene-3,17-dione (AND)   | 103 ± 3         | 101 ± 7         |
| Diethylstilbestrol (DES)        | 89 ± 1          | 100 ± 8         |
| Hexestrol (HEX)                 | 106 ± 2         | 101 ± 8         |
| Progesterone (P)                | 105 ± 3         | 94 ± 7          |

<sup>a</sup> Spiking level: 450 µg/L

<sup>b</sup> Conditioning: 3 x 2 mL methanol and 3 x 5 mL water; washing: 3 x 5 mL water; elution: 3 x 2 mL methanol.

<sup>c</sup> Conditioning: 2 mL methanol and 2 mL water; washing: 5 mL water; elution: 2 mL methanol (optimized conditions)

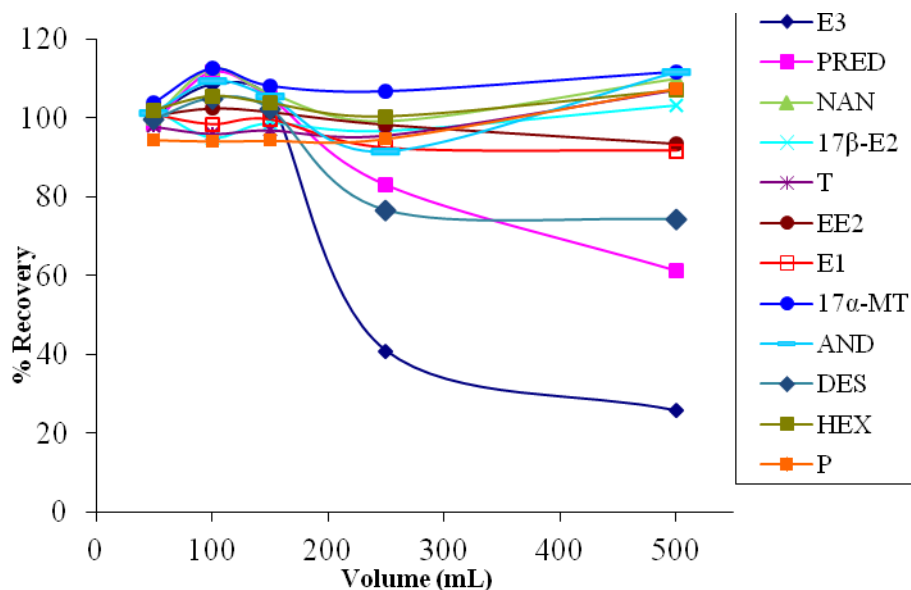

**Fig. A5.** Recoveries curves versus sample volume obtained from the off-line SPE analysis of Milli-Q water spiked with a mixture of the analytes extracted with SPE cartridges packed with SBA-15-C<sub>18</sub>. Estriol (E3), prednisolone (PRED), nandrolone (NAN), 17β-estradiol (17β-E2), testosterone (T), ethinylestradiol (EE2), estrone (E1), 17α-methyltestosterone (17α-MT), 4-androstene-3,17-dione (AND), diethylstilbestrol (DES), hexestrol (HEX) and progesterone (P).

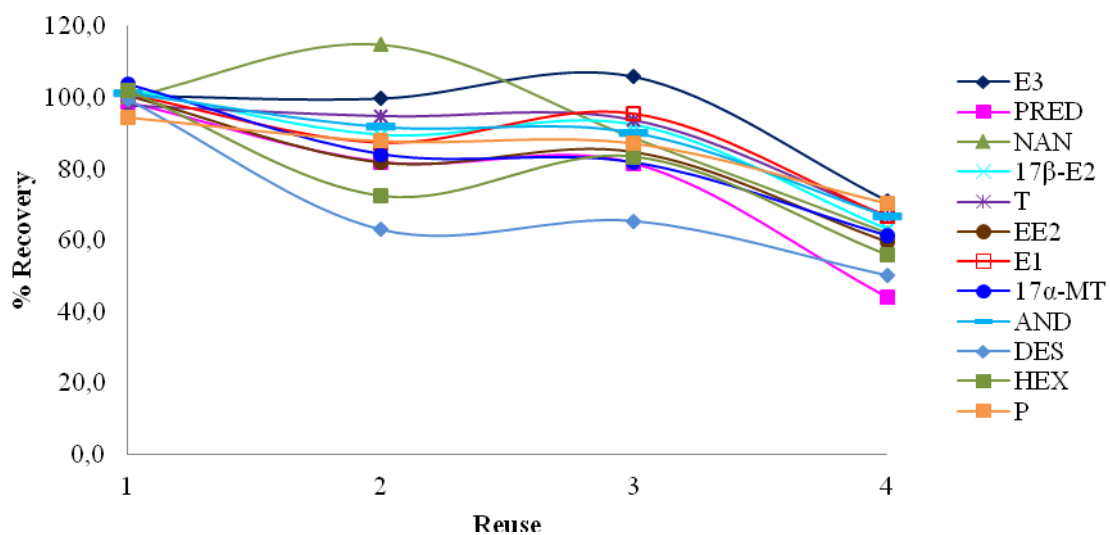

**Fig. A6.** Reusability of the SPE cartridges packed with SBA-15-C<sub>18</sub>. Estriol (E3), prednisolone (PRED), nandrolone (NAN), 17 $\beta$ -estradiol (17 $\beta$ -E2), testosterone (T), ethinylestradiol (EE2), estrone (E1), 17 $\alpha$ -methyltestosterone (17 $\alpha$ -MT), 4-androstene-3,17-dione (AND), diethylstilbestrol (DES), hexestrol (HEX) and progesterone (P).
